# Supplementary material for: Randomised, single-masked non-inferiority trial of femtosecond laser-assisted versus manual phacoemulsification cataract surgery for adults with visually significant cataract: the FACT trial protocol
Source: HighWire-hosted journal article supplement (doi:10.1136/bmjopen-2015-010381), 2015-11-01
Supplement: bmjopen-2015-010381supp1.pdf [file bmjopen-2015-010381supp1.pdf]

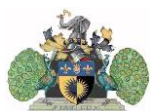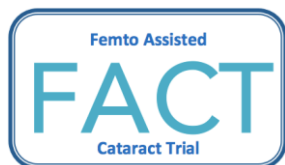

## A Randomised Comparison of Femtosecond Laser Assisted vs Manual Phacoemulsification Cataract Surgery for Adults with Visually Significant Cataract

Study Number:

Participant Identification Number for this trial:

### CONSENT FORM

Please initial  
each line

- 1 I have read the information sheet version \_\_\_\_\_ dated \_\_\_\_\_ for this study. I have had the opportunity to consider the information and ask questions that have been answered satisfactorily. \_\_\_\_\_
- 2 I understand that my participation in this study is voluntary and that I am free to withdraw at any time, without giving any reason and without my medical care or legal rights being affected. \_\_\_\_\_
- 3 I understand that the information collected may be used to support other research on cataracts in the future. \_\_\_\_\_
- 4 I agree to my General Practitioner being informed of my participation in this study. \_\_\_\_\_
- 5 I understand that relevant sections of my medical notes and data collected during the study may be looked at by individuals from the sponsor of the trial (University College London), regulatory authorities, or from the NHS Trust, where it is relevant to my taking part in this research. \_\_\_\_\_
- 6 I agree to take part in the above study. \_\_\_\_\_

### Optional sections:

- A I agree that photographs or recordings of my eye operation may be taken for analysis and/ or use in publications or presentations. I understand that I will not be identifiable from these images as they are close ups of my eye and do not include my face. \_\_\_\_\_
- B I agree to provide contact details for a family member, carer or friend to be used in case the study team are unable to contact me for follow up appointments. \_\_\_\_\_

\_\_\_\_\_  
Name of Participant

\_\_\_\_\_  
Date

\_\_\_\_\_  
Signature

\_\_\_\_\_  
Name of Researcher

\_\_\_\_\_  
Date

\_\_\_\_\_  
Signature
